# Supplementary material for: Bacterial membrane vesicles transport their DNA cargo into host cells
Source: PubMed Central journal article supplement (PMC5539193; doi:10.1038/s41598-017-07288-4), 2017-08-01
Supplement: 41598_2017_7288_MOESM1_ESM.pdf [file 41598_2017_7288_MOESM1_ESM.pdf]

## Supplementary Information

### **Bacterial membrane vesicles transport their DNA cargo into host cells**

Natalie J. Bitto<sup>1,2</sup>, Ross Chapman<sup>1</sup>, Sacha Pidot<sup>3</sup>, Adam Costin<sup>4,5</sup>, Camden Lo<sup>4</sup>, Jasmine Choi<sup>1</sup>, Tanya D'Cruze<sup>6</sup>, Eric C. Reynolds<sup>6</sup>, Stuart G. Dashper<sup>6</sup>, Lynne Turnbull<sup>7</sup>, Cynthia B. Whitchurch<sup>7</sup>, Timothy P. Stinear<sup>3</sup>, Katryn J. Stacey<sup>8</sup> and Richard L. Ferrero<sup>1,2\*</sup>

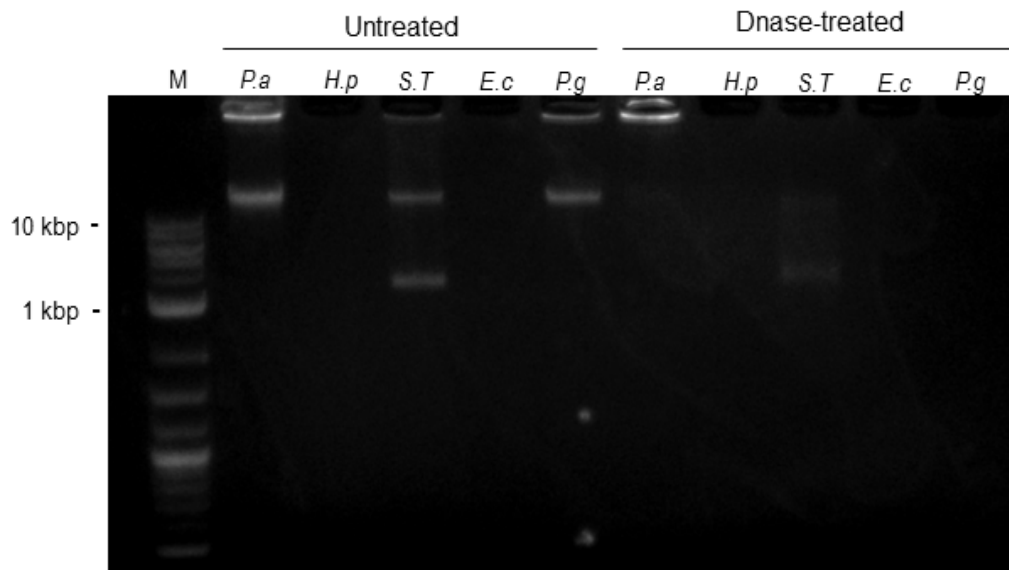

**Supplementary Fig. 1** Agarose gel electrophoresis of untreated and DNase treated OMVs from *P. aeruginosa* (*P.a*), *H. pylori* (*H.p*), *S. Typhimurium* (*S.t*), uropathogenic *E coli* (*E.c*) and *P. gingivalis* (*P.g*). M = 2-log ladder marker (NEB).

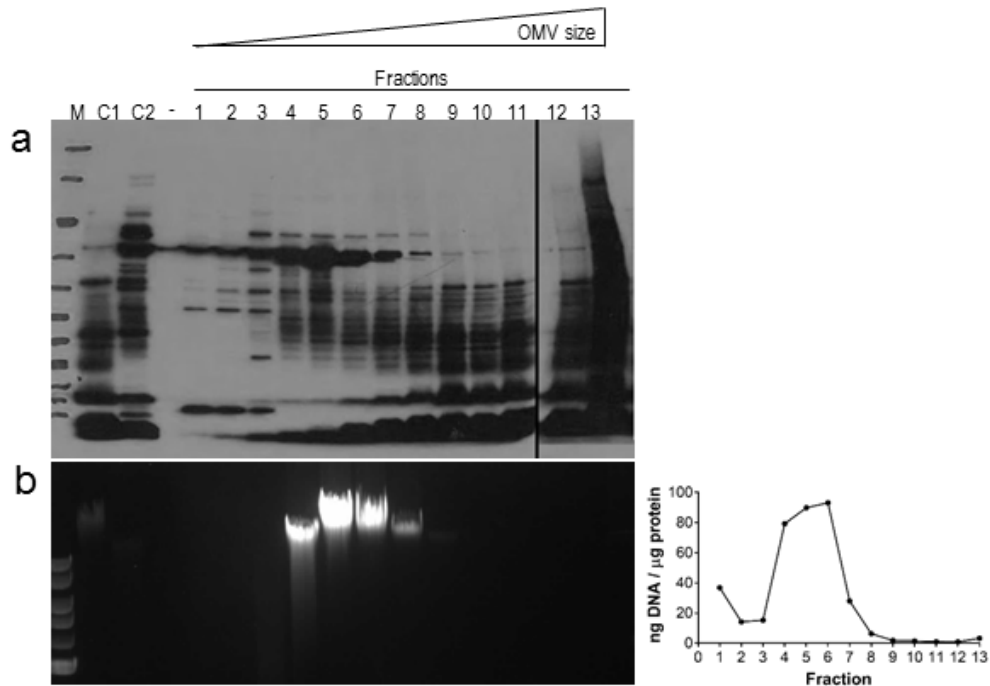

**Supplementary Fig. 2** OMVs are associated with high molecular weight DNA.

(a) Western blot showing OMVs from *P. aeruginosa* fractionated based on size by sucrose density gradient. Controls include unfractionated OMVs (C1) and *P. aeruginosa* whole cell lysate (C2). Fractions and controls were run on a NuPAGE Bis-Tris 4-12% gel and detection of *P. aeruginosa*-specific proteins was carried out using a polyclonal anti-*Pseudomonas* antibody (Abcam). (b) Agarose gel electrophoresis of *P. aeruginosa* OMV fractions, stained with ethidium bromide, showing high molecular weight DNA associated with OMV fractions 4-9. Quantification of the DNA concentration of each fraction, determined by Qubit dsDNA assay (Life Technologies), is shown.

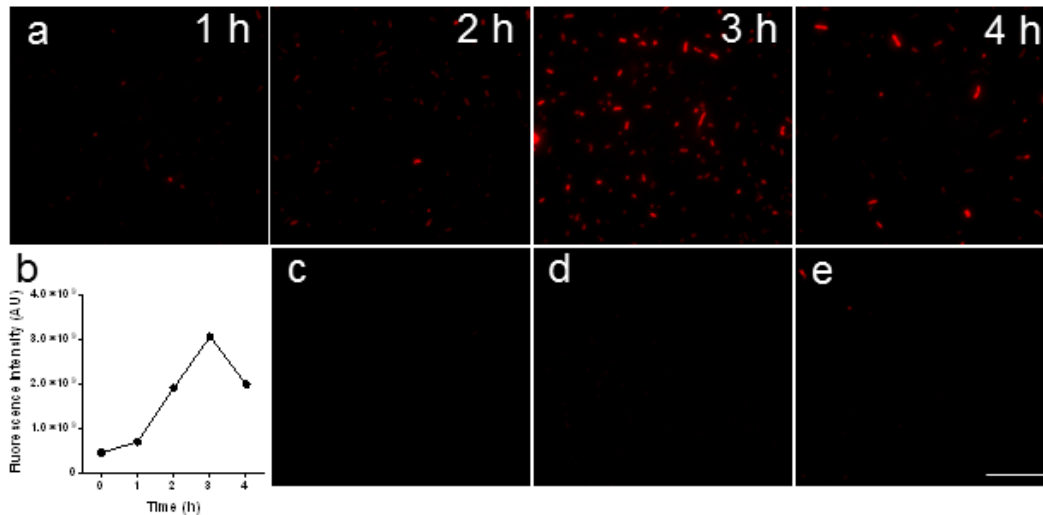

**Supplementary Fig. 3** Incorporation of the nucleoside analogue EdU into the gDNA of *P. aeruginosa* bacteria. (a) Cultures were grown in the presence of 1.2 mM EdU for 4 h and aliquots were taken every hour to detect EdU incorporation by fluorescence using biotin azide and AlexaFluor 568-conjugated streptavidin (red). (b) Fluorescence intensity was measured over time, corresponding to EdU incorporation during growth. Controls included (c) cultures grown without EdU, (d) biotin azide omitted and (e) permeabilization omitted. (f) Optimization of biotin azide concentration for detection of EdU incorporation into *P. aeruginosa* DNA with concentrations of biotin azide as shown. Scale bar = 20  $\mu$ m.

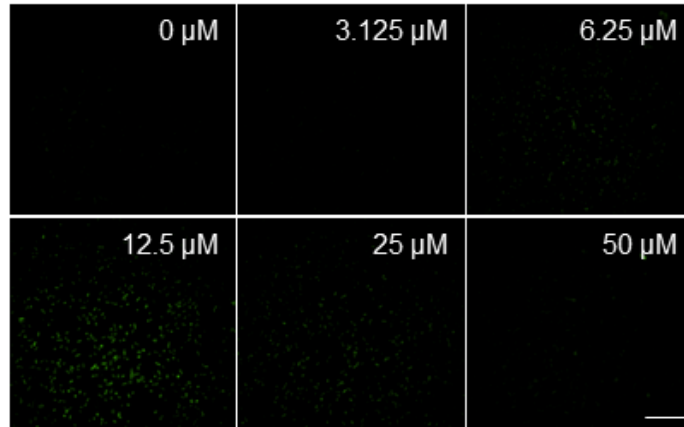

**Supplementary Fig. 4** EdU incorporation into *P. aeruginosa* bacteria and their OMVs. (a) Growth curve of *P. aeruginosa* grown in the presence and absence of EdU, showing that EdU does not affect bacterial growth and that the culture was in mid-log phase when harvested at 4 h post inoculation. (b) *P. aeruginosa* OMVs isolated from culture grown in the presence of EdU for 4 h, showing EdU-labelled DNA associated with OMVs. Scale bar = 10 μm.

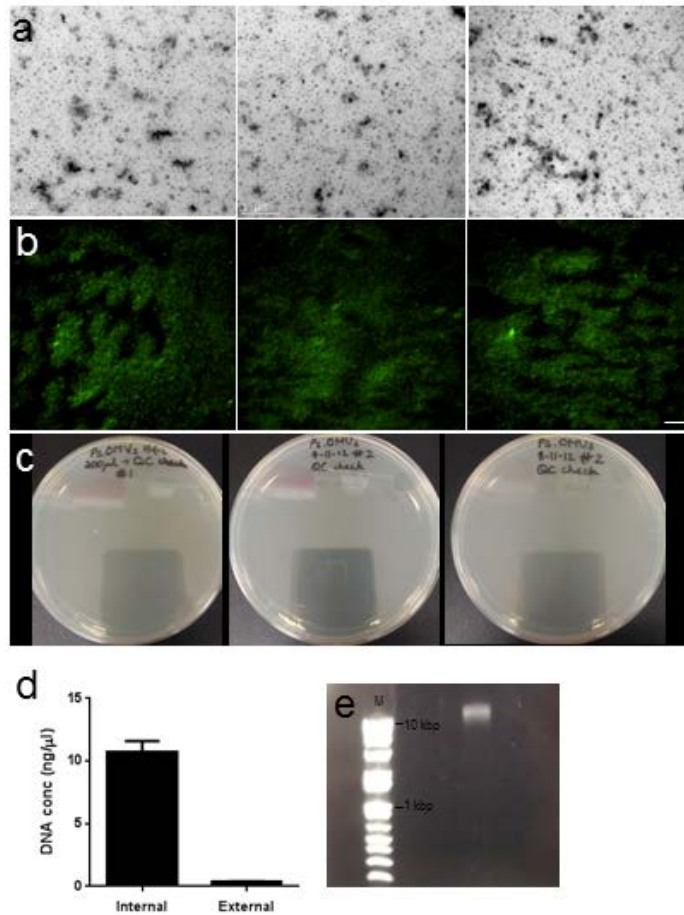

**Supplementary Fig. 5** Screening of *P. aeruginosa* OMVs used for sequencing of OMV associated DNA. The absence of viable and nonviable bacteria was determined by (a) EM and (b) confocal microscopy. The three EM and confocal images are representative of 20 fields of view analyzed. Scale bar = 20  $\mu$ m. (c) The absence of viable bacteria was also verified by the lack of growth on antibiotic free LB agar. (d) Quantification of internal and external DNA in DNase-treated OMVs used for sequencing of internally-derived DNA. (e) Agarose gel electrophoresis of purified, concentrated internally-derived OMV DNA used for sequencing.

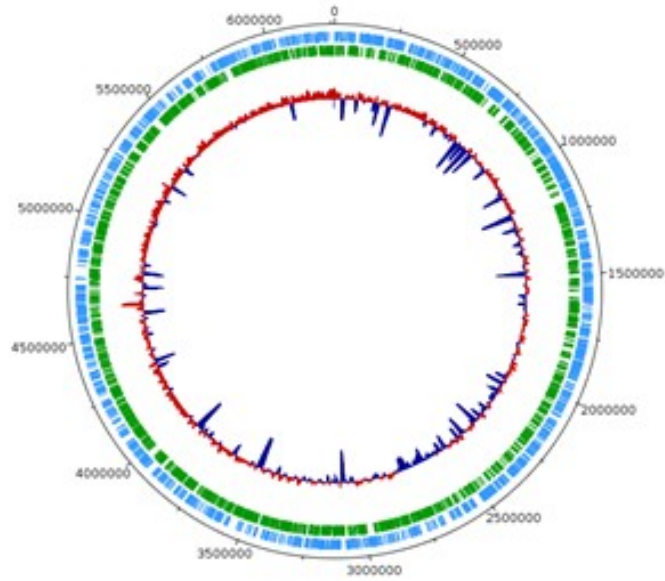

**Supplementary Fig. 6** Sequence of the gDNA control from *P. aeruginosa* PA103 (inner circle) plotted against the *P. aeruginosa* PAO1 reference genome (outermost circle; positive and negative sense genes in green and purple, respectively). Positions showing greater than average read density are colored red while those with less than average density are colored blue.

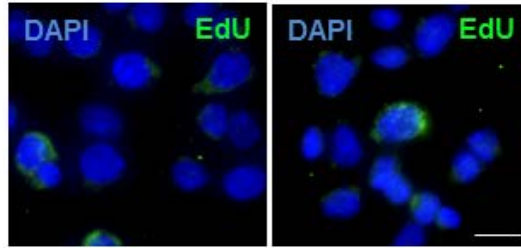

**Supplementary Fig. 7** OMV-associated DNA is transported into human gastric epithelial cells (AGS). EdU labelled *P. aeruginosa* OMVs (green) taken up by AGS cells (nuclei blue). Scale bar = 15  $\mu$ m.



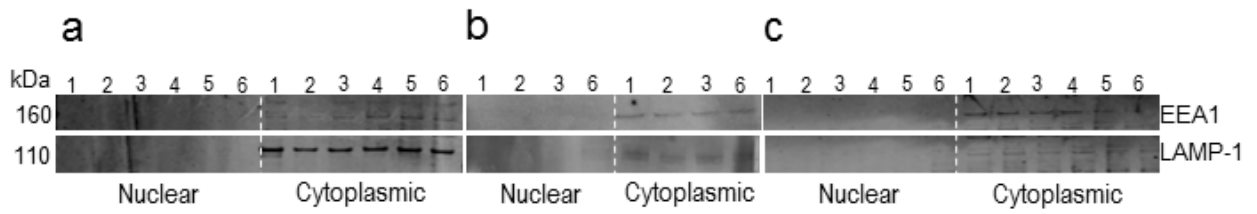

**Supplementary Fig. 8** Verification that endosomal compartments are present only in the cytoplasmic extracts. Western blots show early endosomes (EEA1) and late endosomes (LAMP-1) in cytoplasmic extracts of cells untreated (1), treated with intact OMVs (2), DNase-treated OMVs (3), disrupted OMVs (4), free *P. aeruginosa* gDNA (5), or plasmid pGL3c (6), for (a) 4 h, (b) 8 h and (c) 18 h treatments.

**Supplementary Table 1.** Function and location of genes that were significantly enriched in the internal OMV DNA sequence. A dash is shown where gene symbols are not assigned.

| Gene         | Function                                                       | Location          | Ref  |
|--------------|----------------------------------------------------------------|-------------------|------|
| <i>prc</i>   | Processing of penicillin-binding protein                       | 3642964 - 3645060 | (30) |
| <i>capB</i>  | Cold shock protein                                             | 3653667 - 3653876 | (29) |
| -            | Hypothetical protein                                           | 4297250 - 4298227 |      |
| -            | Probable permease of ABC transporter                           | 4298311 - 4299201 |      |
| -            | Probable ATP-binding component of ABC transporter              | 4299204 - 4299998 |      |
| -            | probable sodium:sulfate symporter                              | 4300117 - 4301949 |      |
| -            | Conserved hypothetical protein                                 | 4302041 - 4303051 |      |
| <i>spcS</i>  | Chaperone required for secretion of ExoS cytotoxin             | 4304690 - 4305040 | (26) |
| -            | Hypothetical protein                                           | 4305645 - 4306256 |      |
| -            | Probable transcriptional regulator                             | 4306380 - 4307276 |      |
| -            | Hypothetical protein                                           | 4307266 - 4307808 |      |
| -            | Conserved hypothetical protein                                 | 4307912 - 4308382 |      |
| -            | Hypothetical protein                                           | 4308456 - 4309811 |      |
| -            | Conserved hypothetical protein                                 | 4309904 - 4310908 |      |
| <i>exoS</i>  | Cytotoxin (NAD <sup>+</sup> asparagine ADP-ribosyltransferase) | 4303141 - 4304502 | (25) |
| -            | Hypothetical protein                                           | 4310951 - 4311862 |      |
| -            | Hypothetical protein                                           | 4311951 - 4312703 |      |
| -            | Hypothetical protein                                           | 4312707 - 4313642 |      |
| -            | Probable transferase                                           | 4313763 - 4314452 |      |
| -            | Hypothetical protein                                           | 4314481 - 4314795 |      |
| -            | Hypothetical protein                                           | 4314788 - 4315489 |      |
| -            | Hypothetical protein                                           | 4315556 - 4316038 |      |
| <i>pcs</i>   | Phosphatidylserine synthase (phospholipid synthesis)           | 4316109 - 4316825 | (32) |
| -            | Probable amino acid-binding protein                            | 4316937 - 4317962 |      |
| -            | Carboxylesterase                                               | 4318259 - 4318906 |      |
| -            | Probable AMP-binding enzyme                                    | 4318922 - 4320820 |      |
| <i>rhlB</i>  | Rhamnolipid biosurfactant synthesis                            | 4321434 - 4322627 | (27) |
| <i>dauB</i>  | Predicted ornithine cyclodeaminase                             | 4322788 - 4323735 | (31) |
| <i>dauA</i>  | Glycine/D-amino acid oxidases                                  | 4323758 - 4324885 | (31) |
| <i>narI</i>  | respiratory nitrate reductase gamma subunit                    | 4335276 - 4335959 | (28) |
| <i>narJ</i>  | nitrate reductase cofactor assembly chaperone                  | 4335962 - 4336702 | (28) |
| <i>narH</i>  | Nitrate reductase beta subunit                                 | 4336708 - 4338249 | (28) |
| <i>narG</i>  | Nitrate reductase alpha subunit                                | 4338261 - 4342046 | (28) |
| <i>narK2</i> | Nitrate/nitrite transporter                                    | 4342122 - 4343528 | (28) |
| <i>narK1</i> | Nitrate/nitrite transporter                                    | 4343540 - 4344835 | (28) |
